# Supplementary material for: Exosomal TNF-α mediates voltage-gated Na+ channel 1.6 overexpression and contributes to brain tumor–induced neuronal hyperexcitability
Source: PubMed Central journal article supplement (PMC11405049; doi:10.1172/jci166271), 2024-08-01

Trivino et al, 2024

TNF- $\alpha$  blot in Fig. 6A (original image)

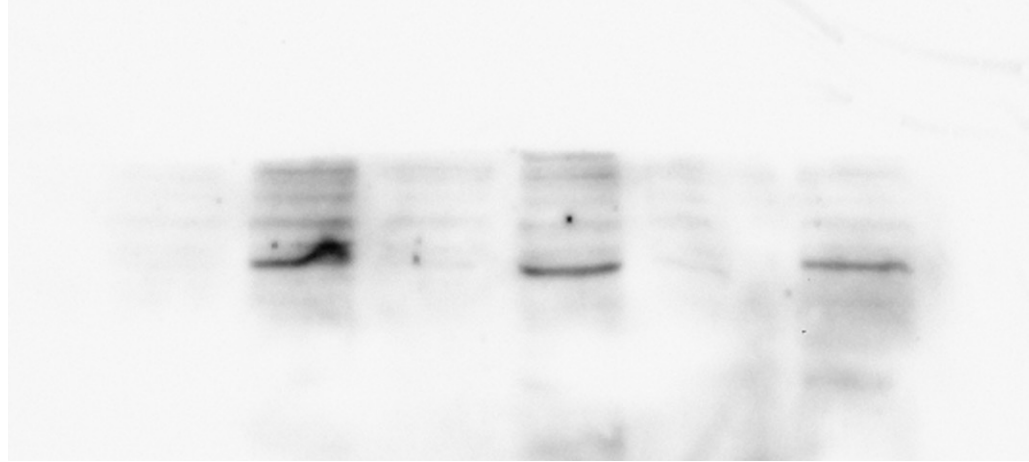

ALIX blot in Fig. 6A (original image)

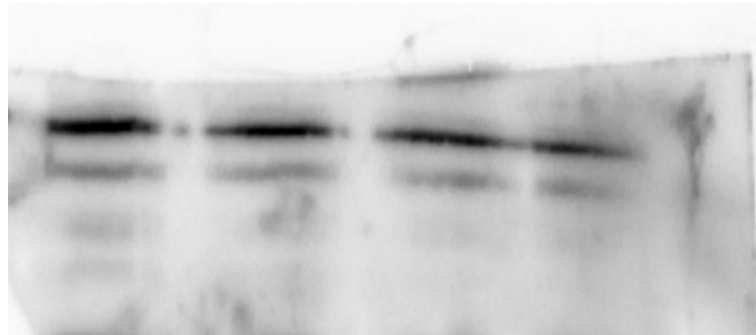

Supplement: jci-134-166271-s197.pdf [file jci-134-166271-s197.pdf]
